# Supplementary material
Source: publisher figshare collection journal article supplement (https://acs.figshare.com/ndownloader/files/27242708)
Supplement: Supplementary file 1 [file 27242708]

## Supporting Information

Single O atom doped Ag cluster cations for CO oxidation: A  
superatom  $\text{Ag}_{15}\text{O}^+$  with endohedral O

*Qiuying Du<sup>1, §</sup>, Jin Hu<sup>2, §</sup>, Xiaopeng Xing<sup>2\*</sup>, Si Zhou<sup>1\*</sup>, Jijun Zhao<sup>1\*</sup>*

<sup>1</sup>Key laboratory of Material Modification by Laser, Ion and Electron Beams (Dalian University of Technology), Ministry of Education, Dalian 116024, China

<sup>2</sup> School of Chemical Science and Engineering, Shanghai Key Lab of Chemical Assessment and Sustainability, Tongji University, 1239 Siping Road, Shanghai 200092, China

### Details of computational methods:

The comprehensive genetic algorithm (CGA) operated on Gaussian16<sup>1</sup> package was used to unbiased global search the structures of  $\text{Ag}_n\text{O}^+$  ( $n = 7-11, 15, 19, 22$ ) clusters. The cam-B3LYP functional and LanL2DZ basis set were used for structure optimization during each step of CGA. At the beginning of CGA search, sixteen isomers were generated randomly as initial populations of  $\text{Ag}_n\text{O}^+$  ( $n = 7-11, 15, 19, 22$ ) clusters. Each child structure was produced by mating, mutation, or exchanges the atomic type of a pair of atoms operations with probability of 40, 20 and 40 percent, respectively. Three thousand iterations were lasted up to ensure getting the global minimum on the potential energy surface for each  $\text{Ag}_n\text{O}^+$  cluster. More details of CGA can be found in a review article.<sup>2</sup> The low-energy isomers from CGA were re-optimized by using a higher-level cam-B3LYP/SDD method to distinct the final lowest-energy structure of clusters.

As for interactions between  $\text{Ag}_n\text{O}^+$  ( $n = 7-10, 15$ ) clusters with CO, we employed the aug-cc-pVDZ-pp basis set for Ag and the 6-311G(d) basis set for C and O respectively accompanied with cam-B3LYP functional considering the Grimme's semiempirical D3 dispersion correction. For both structure optimization and kinetic barrier calculations, the thermal effect (240K) was considered by including zero point energy and entropy correction to the total energy. Transition states and kinetic barriers for CO oxidation were obtained by Berny algorithm. The obtained reactants, intermediates, final product structures and transition states were confirmed by analyzing their vibrational modes, which have no and only one imaginary frequency, respectively. Charger distributions of structures were obtained by using natural population analysis (NPA). The feasibility of cam-B3LYP functional combined with LanL2DZ, SDD, and aug-cc-pVDZ-pp basis sets were supported by benchmark calculations for  $\text{Ag}_2$  dimer in Table S1 of Supporting Information.

Using the initial structures from Gaussian16, total energies considered scalar-relativistic effect based on the zero order regular approximation (ZORA) were performed by using ADF 2018.104 package.<sup>3-5</sup> The cam-B3LYP functional accompanied with the all-electron Slater basis set of triple-zeta with polarization

function (TZP) was employed for calculating pristine  $\text{Ag}_n\text{O}^+$  clusters. In addition, the Grimme's semiempirical D3 dispersion correction was considered for calculating the interaction between  $\text{Ag}_n\text{O}^+$  clusters with CO. The interaction and chemical bonding nature between the O species and  $\text{Ag}_n^+$  fragment of each  $\text{Ag}_n\text{O}^+$  clusters,  $\text{Ag}_n\text{O}^+$  cluster and CO molecule were described using the energy decomposition analysis and natural orbitals for chemical valence (EDA-NOCV) method.<sup>6-8</sup> From EDA, the total bonding energy can be divided into three parts:

$$\Delta E_{\text{int}} = \Delta E_{\text{pauli}} + \Delta E_{\text{elstat}} + \Delta E_{\text{oi}} \quad (\text{s1})$$

$\Delta E_{\text{pauli}}$  is the repulsion energy caused by the Pauli exclusion principle between two fragments,  $\Delta E_{\text{elstat}}$  and  $\Delta E_{\text{oi}}$  are the attraction energies from electrostatic and orbital interactions between two fragments, respectively.

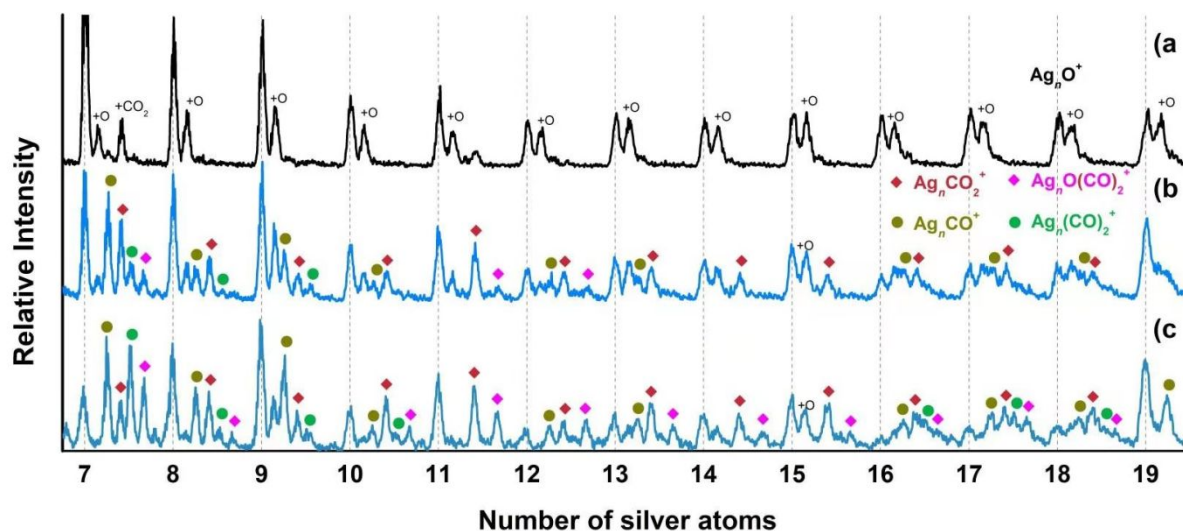

**Figure S1.** Mass spectra of  $\text{Ag}_n\text{O}^+$  ( $n = 7\text{--}19$ ) (a) and their reaction products after exposure to different quantity of CO gas with flow rates of (b) 0.025 sccm and (c) 0.05 sccm at 200 K.

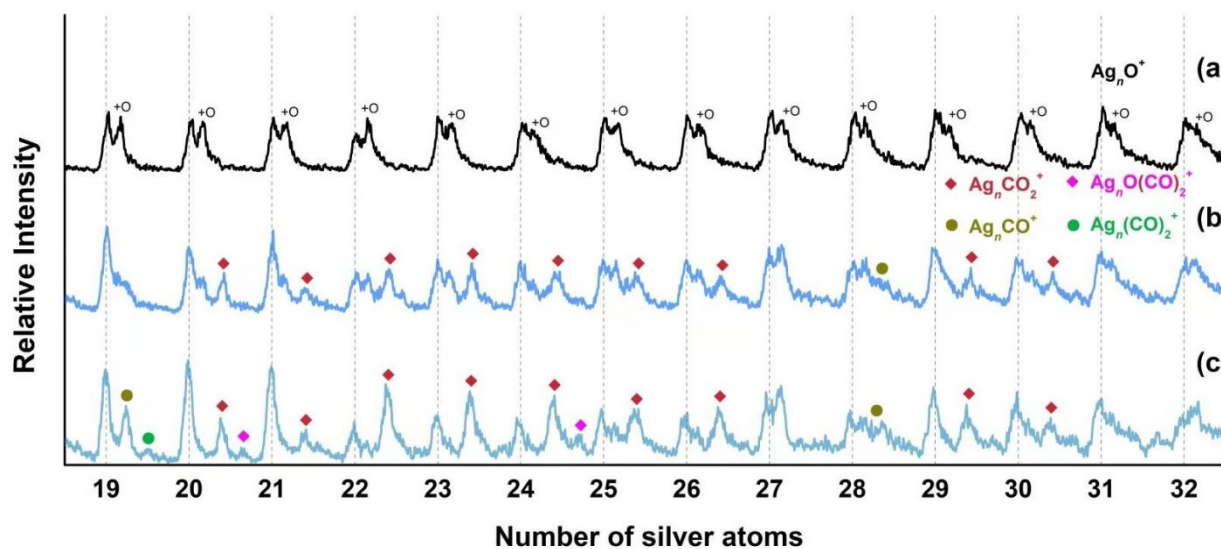

**Figure S2.** Mass spectra of  $\text{Ag}_n\text{O}^+$  ( $n = 19\text{--}32$ ) (a) and their reaction products after exposure to different quantity of CO gas with flow rates of (b) 0.025 sccm and (c) 0.050 sccm at 200 K.

Figure S1 and S2 show the reaction products of  $\text{Ag}_n\text{O}^+$  ( $n = 7-19$ ) and  $\text{Ag}_n\text{O}^+$  ( $n = 19-32$ ) at 200 K. In Figure S1, most  $\text{Ag}_n^+$  and  $\text{Ag}_n\text{O}^+$  combine one or two CO molecules, forming species with the formula of  $\text{Ag}_n\text{CO}^+$ ,  $\text{Ag}_n(\text{CO})_2^+$ ,  $\text{Ag}_n\text{CO}_2^+$  and  $\text{Ag}_n\text{O}(\text{CO})_2^+$ . For the larger clusters shown in Figure S2, the CO adsorption species are not as abundant as those shown in Figure S1, and only a few clusters form products containing two CO molecules. It is also found that the intensities of products with multiple CO molecules and several ones with only one CO molecule increase with decreasing the temperature, and vice versa. In addition, the abundances of these products decrease with increasing cluster sizes on which the positive charge is more dispersed. The effects of temperature and the cluster size indicate that they are stabilized by electrostatic physisorption interactions rather than chemical bonding interactions.

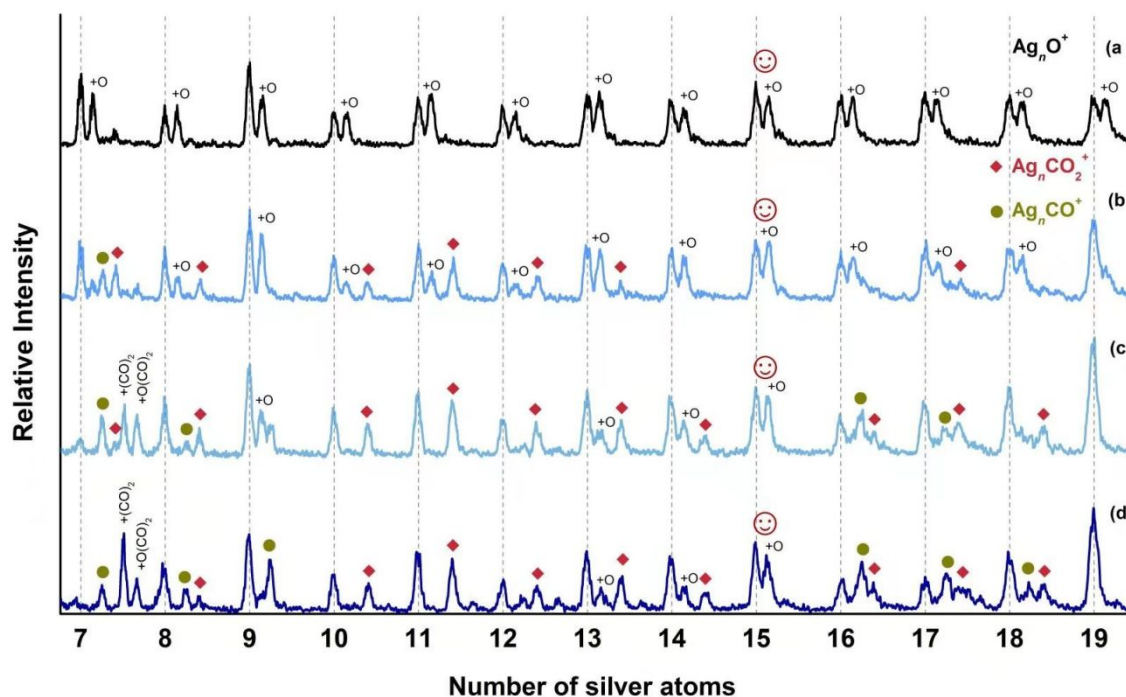

**Figure S3.** Mass spectra of  $\text{Ag}_n\text{O}^+$  ( $n = 7\text{--}19$ ) (a) and their reaction products after exposure to different quantity of CO gas with flow rates of (b) 0.025 sccm, (c) 0.100 sccm and (d) 0.200 sccm at 240 K. The smiling face marked the cluster that is inert toward CO.

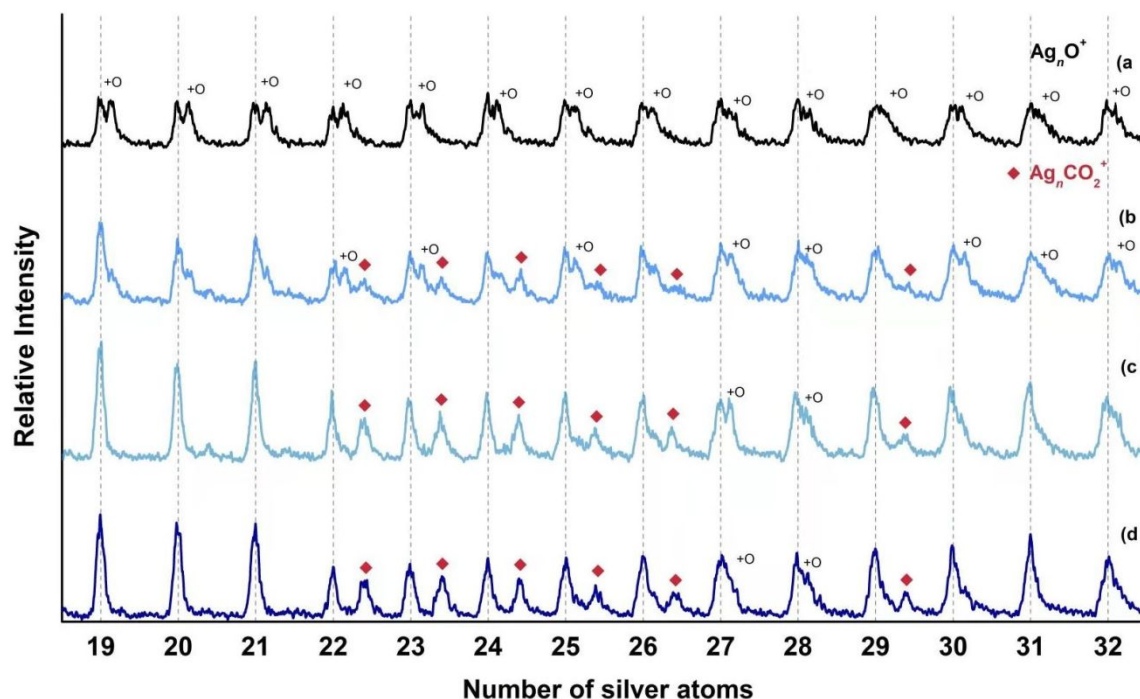

**Figure S4.** Mass spectra of  $\text{Ag}_n\text{O}^+$  ( $n = 19\text{--}32$ ) (a) and their reaction products after exposure to different quantity of CO gas with flow rates of (b) 0.025 sccm, (c) 0.100 sccm and (d) 0.200 sccm at 240 K.

Figure S3 and S4 show the reaction products of  $\text{Ag}_n\text{O}^+$  ( $n = 7-19$ ) and  $\text{Ag}_n\text{O}^+$  ( $n = 19-32$ ) at 240 K. At this temperature, the CO adsorption processes due to weak physisorption interactions are largely suppressed. The products containing more than one CO molecules are only observed on the clusters  $\text{Ag}_7$  and  $\text{Ag}_7\text{O}^+$ , on which the positive charge is more concentrated than those on the large sizes. The suppression of physisorption processes at 240 K made it easy to distinguish the products from chemical reactions between this unique  $\text{Ag}_n\text{O}^+$  cluster series and single CO. The reaction characters of all  $\text{Ag}_n\text{O}^+$  ( $n = 7-32$ ) can be summarized as follows:

Mechanism (I)  $\text{Ag}_n\text{O}^+ + \text{CO} = \text{Ag}_n\text{CO}_2^+$

$n = 7, 8, 10, 11, 12, 13, 14, 17, 18, 22-26$ , and 29;

Mechanism (II)  $\text{Ag}_n\text{O}^+ + \text{CO} = \text{Ag}_n^+ + \text{CO}_2$

$n = 8, 9, 16, 17, 18, 19, 20, 21, 30, 31$ , and 32;

Relatively inert sizes  $n = 15, 27$ , and 28.

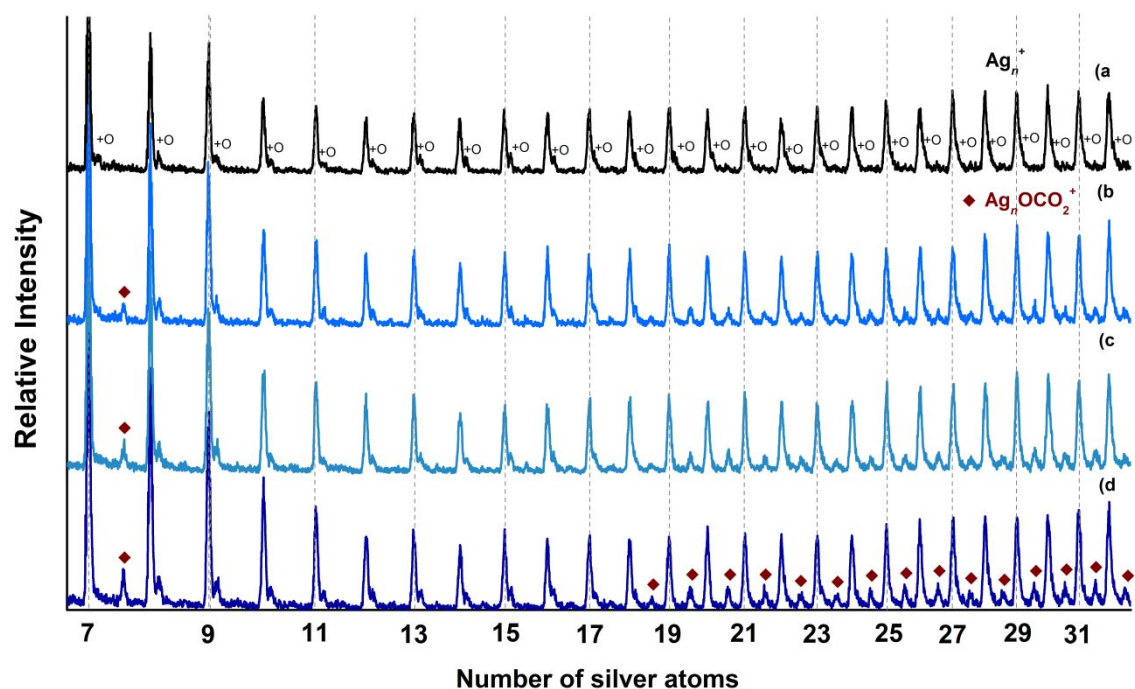

**Figure S5.** Mass spectra of  $\text{Ag}_n^+$  ( $n = 7\text{--}32$ ) (a) and the clusters after exposure to different quantity of  $\text{CO}_2$  gas with flow rates of (b) 1.00 sccm, (c) 4.00 sccm and (d) 12.00 sccm at 225 K. No  $\text{Ag}_n\text{CO}_2^+$  ( $n = 7\text{--}32$ ) products were observed even though the  $\text{CO}_2$  flow rates were much higher and the temperature was lower than the parameters used in Figure S4. This indicates there should be a barrier from free  $\text{CO}_2$  molecules to the  $\text{CO}_2$  units of all  $\text{Ag}_n\text{CO}_2^+$  presented in Figure S4, i.e., their  $\text{CO}_2$  units were chemically bonded. Weak  $\text{Ag}_n\text{O}^+$  ( $n = 7\text{--}32$ ) peaks appeared in (a) because of background oxygen not completely cleaned after the previous experiments, which formed the  $\text{Ag}_n\text{OCO}_2^+$  series in (b)-(d) in reactions with  $\text{CO}_2$ .



**Table S1.** Error between calculated bond length ( $\delta_R$ , in Å) and frequency ( $\delta_\omega$ , in  $\text{cm}^{-1}$ ) with different functional basis set combinations and experimental values of  $\text{Ag}_2$  dimer.<sup>9-10</sup>

|                  | LanL2DZ    |                 | LanL2TZ    |                 | SDD        |                 | cc-PVTZ-pp |                 | def2-TZVPP |                 | dhf-TZVP   |                 | aug-cc-pVDZ-pp |                 | aug-cc-pVTZ-pp |                 |
|------------------|------------|-----------------|------------|-----------------|------------|-----------------|------------|-----------------|------------|-----------------|------------|-----------------|----------------|-----------------|----------------|-----------------|
|                  | $\delta_R$ | $\delta_\omega$ | $\delta_R$     | $\delta_\omega$ | $\delta_R$     | $\delta_\omega$ |
| <b>B3LYP</b>     | 0.08       | -14.67          | 0.08       | -15.77          | 0.06       | -12.74          | 0.06       | -12.77          | 0.06       | -15.4           | 0.06       | -14.44          | 0.06           | -14.06          | 0.05           | -12.43          |
| <b>cam-B3LYP</b> | 0.06       | -2.31           | 0.05       | -2.48           | 0.04       | -0.34           | 0.03       | -2.42           | 0.04       | -4.51           | 0.03       | -3.18           | 0.03           | -3.15           | 0.03           | -1.95           |
| <b>B3PW91</b>    | 0.06       | -7.17           | 0.06       | -8.76           | 0.04       | -5.53           | 0.04       | -7.56           | 0.04       | -9.57           | 0.04       | -8.17           | 0.04           | -7.71           | 0.03           | -6.65           |
| <b>PW91</b>      | 0.05       | -5.15           | 0.05       | -6.54           | 0.04       | -3.23           | 0.03       | -5.57           | 0.03       | -7.81           | 0.03       | -6.33           | 0.03           | -5.63           | 0.02           | -4.35           |
| <b>O3LYP</b>     | 0.11       | -30.45          | 0.10       | -30             | 0.08       | -25.26          | 0.08       | -24.2           | 0.08       | -25.64          | 0.07       | -24.02          | 0.07           | -23.68          | 0.06           | -22.43          |
| <b>X3LYP</b>     | 0.08       | -14.33          | 0.08       | -15.36          | 0.06       | -12.12          | 0.06       | -12.58          | 0.06       | -14.32          | 0.06       | -13.47          | 0.06           | -13.21          | 0.05           | -11.97          |
| <b>HSE06</b>     | 0.06       | -7.45           | 0.06       | -8.8            | 0.05       | -5.42           | 0.04       | -7.62           | 0.04       | -9.18           | 0.04       | -7.84           | 0.04           | -7.48           | 0.03           | -6.63           |
| <b>M06</b>       | 0.06       | -6.09           | 0.07       | -11.93          | 0.06       | -7.33           | 0.06       | -2.35           | 0.06       | -3.65           | 0.06       | -3.06           | 0.06           | -2.44           | 0.06           | -2.35           |
| <b>M06-L</b>     | 0.04       | 3.30            | 0.06       | -7.81           | 0.04       | -5.21           | 0.05       | -12.3           | 0.05       | -12.92          | 0.04       | -11.88          | 0.04           | -11.02          | 0.05           | -12.3           |
| <b>M06-2X</b>    | 0.15       | -29.72          | 0.15       | -29.46          | 0.15       | -31.82          | 0.14       | -38.95          | 0.14       | -40.09          | 0.14       | -39.55          | 0.14           | -39.91          | 0.14           | -38.95          |
| <b>PBE</b>       | 0.06       | -7.32           | 0.06       | -8.62           | 0.04       | -5.92           | 0.04       | -7.51           | 0.04       | -9.6            | 0.03       | -8.07           | 0.03           | -7.52           | 0.04           | -7.51           |
| <b>PBE0</b>      | 0.06       | -8.66           | 0.06       | -9.29           | 0.05       | -6.09           | 0.04       | -8.28           | 0.04       | -9.92           | 0.04       | -8.28           | 0.04           | -8.23           | 0.04           | -8.28           |
| <b>BP86</b>      | 0.05       | -3.14           | 0.05       | -5.91           | 0.04       | -2.87           | 0.03       | -4.71           | 0.03       | -7.31           | 0.03       | -5.8            | 0.03           | -5.07           | 0.03           | -4.71           |
| <b>TPSSh</b>     | 0.05       | -2.53           | 0.05       | -3.67           | 0.03       | -0.38           | 0.03       | -3.56           | 0.03       | -5.51           | 0.02       | -4.16           | 0.02           | -3.55           | 0.03           | -3.56           |

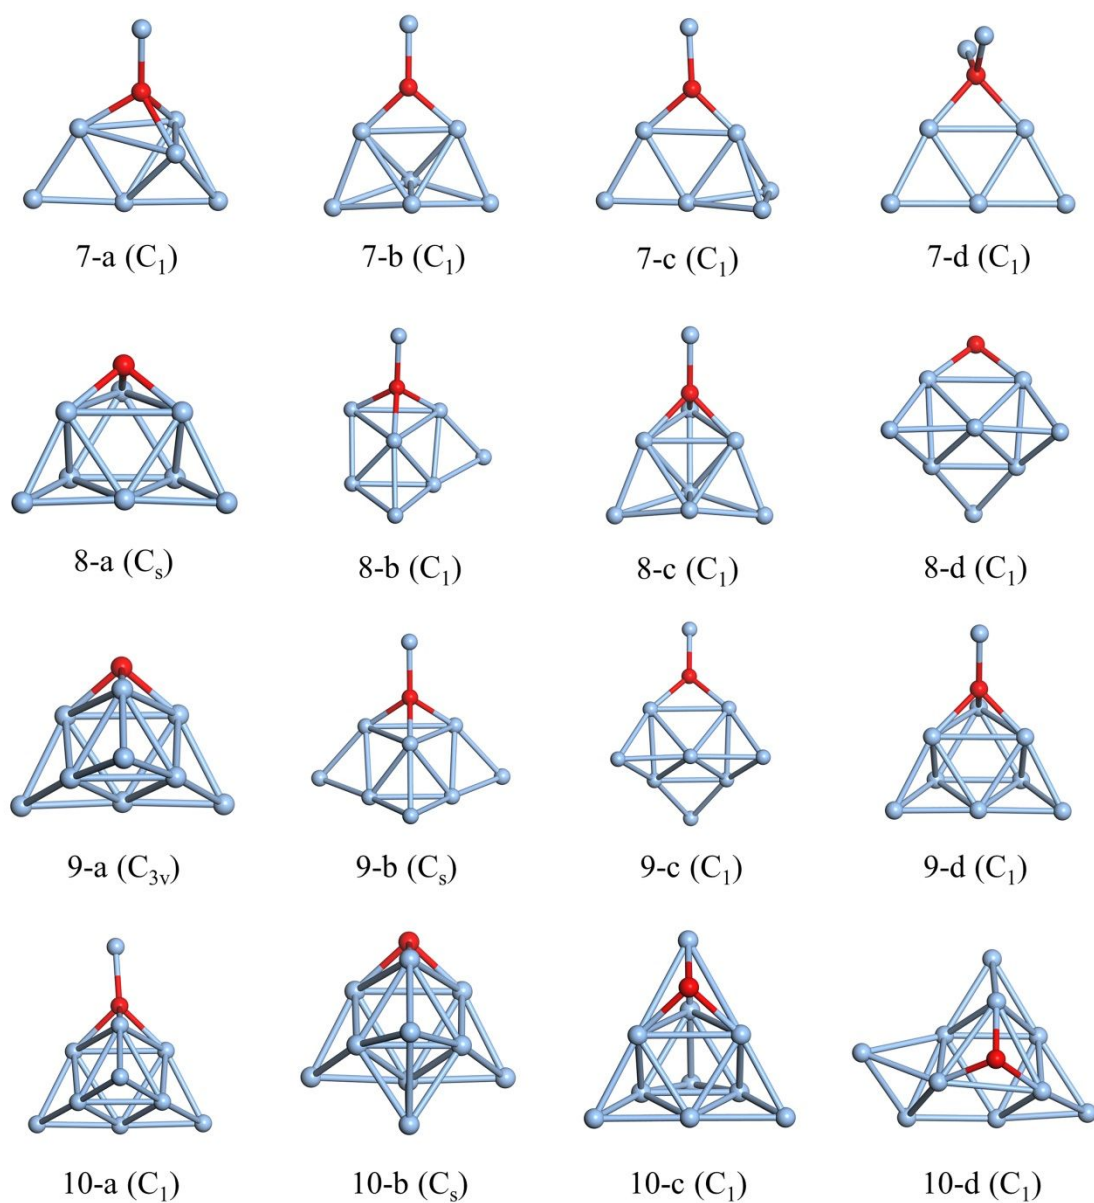

**Figure S6.** Low-energy structures of  $\text{Ag}_{7-10}\text{O}^+$  clusters. For each size  $n$ , the isomers were marked as  $n$ -b,  $n$ -c,  $n$ -d relating to the energy difference with the lowest-energy one (marked as  $n$ -a). The cluster symmetries are given in brackets. The silver and oxygen atoms are shown in blue and red, respectively.

**Table S2.** The geometric and electronic properties of  $\text{Ag}_{7-10}\text{O}^+$  clusters from cam-B3LYP/SDD calculation considering zero point and thermal correction, including energy difference between isomers with G-S at each size  $n$  ( $\Delta E_{\text{GS}}$ ), binding energy per atom ( $E_{\text{b}}$ ), HOMO-LUMO gap ( $E_{\text{HL}}$ ), average bond length between Ag and O ( $R_{\text{Ag-O}}$ ), average bond length between Ag and Ag ( $R_{\text{Ag-Ag}}$ ), and minimum frequency ( $\nu_{\text{min}}$ ).

| Cluster     | $\Delta E_{\text{GS}}$ (eV) | $E_{\text{b}}$ (eV) | $E_{\text{HL}}$ (eV) | $R_{\text{Ag-O}}$ (Å) | $R_{\text{Ag-Ag}}$ (Å) | $\nu_{\text{min}}$ (cm <sup>-1</sup> ) |
|-------------|-----------------------------|---------------------|----------------------|-----------------------|------------------------|----------------------------------------|
| <b>7-a</b>  | <b>0.000</b>                | <b>0.710</b>        | <b>4.500</b>         | <b>2.189</b>          | <b>2.860</b>           | <b>30.75</b>                           |
| 7-b         | 0.116                       | 0.696               | 4.590                | 2.076                 | 2.842                  | 20.36                                  |
| 7-c         | 0.144                       | 0.692               | 4.436                | 2.070                 | 2.805                  | 17.56                                  |
| 7-d         | 0.275                       | 0.676               | 3.405                | 2.159                 | 3.103                  | 11.12                                  |
| <b>8-a</b>  | <b>0.000</b>                | <b>0.776</b>        | <b>3.728</b>         | <b>2.144</b>          | <b>2.883</b>           | <b>41.09</b>                           |
| 8-b         | 0.039                       | 0.771               | 3.374                | 2.169                 | 2.853                  | 19.71                                  |
| 8-c         | 0.109                       | 0.764               | 3.265                | 2.178                 | 2.874                  | 26.14                                  |
| 8-d         | 0.143                       | 0.760               | 4.844                | 2.155                 | 2.823                  | 21.23                                  |
| <b>9-a</b>  | <b>0.000</b>                | <b>0.944</b>        | <b>4.871</b>         | <b>2.120</b>          | <b>2.861</b>           | <b>50.87</b>                           |
| 9-b         | 0.183                       | 0.925               | 4.408                | 2.162                 | 2.836                  | 16.85                                  |
| 9-c         | 0.296                       | 0.914               | 4.844                | 2.070                 | 2.814                  | 12.75                                  |
| 9-d         | 0.393                       | 0.904               | 3.674                | 2.186                 | 2.863                  | 29.50                                  |
| <b>10-a</b> | <b>0.000</b>                | <b>0.976</b>        | <b>2.585</b>         | <b>2.162</b>          | <b>2.856</b>           | <b>24.35</b>                           |
| 10-b        | 0.153                       | 0.962               | 3.265                | 2.148                 | 2.879                  | 22.32                                  |
| 10-c        | 0.248                       | 0.954               | 3.510                | 2.126                 | 2.901                  | -9.62                                  |
| 10-d        | 0.282                       | 0.951               | 3.075                | 2.114                 | 2.885                  | 14.13                                  |

**Table S3.** Energy difference (in eV) between higher spin states relative to the lowest spin state (singlet state for odd  $n$  and doublet state of even  $n$ ) of  $\text{Ag}_n\text{O}^+$  clusters.

| Cluster                    | triplet | quintuplet |
|----------------------------|---------|------------|
| $\text{Ag}_7\text{O}^+$    | 1.86    | 3.20       |
| $\text{Ag}_9\text{O}^+$    | 1.51    | 3.06       |
|                            | quartet | sextet     |
| $\text{Ag}_8\text{O}^+$    | 1.51    | 3.79       |
| $\text{Ag}_{10}\text{O}^+$ | 2.28    | 3.52       |

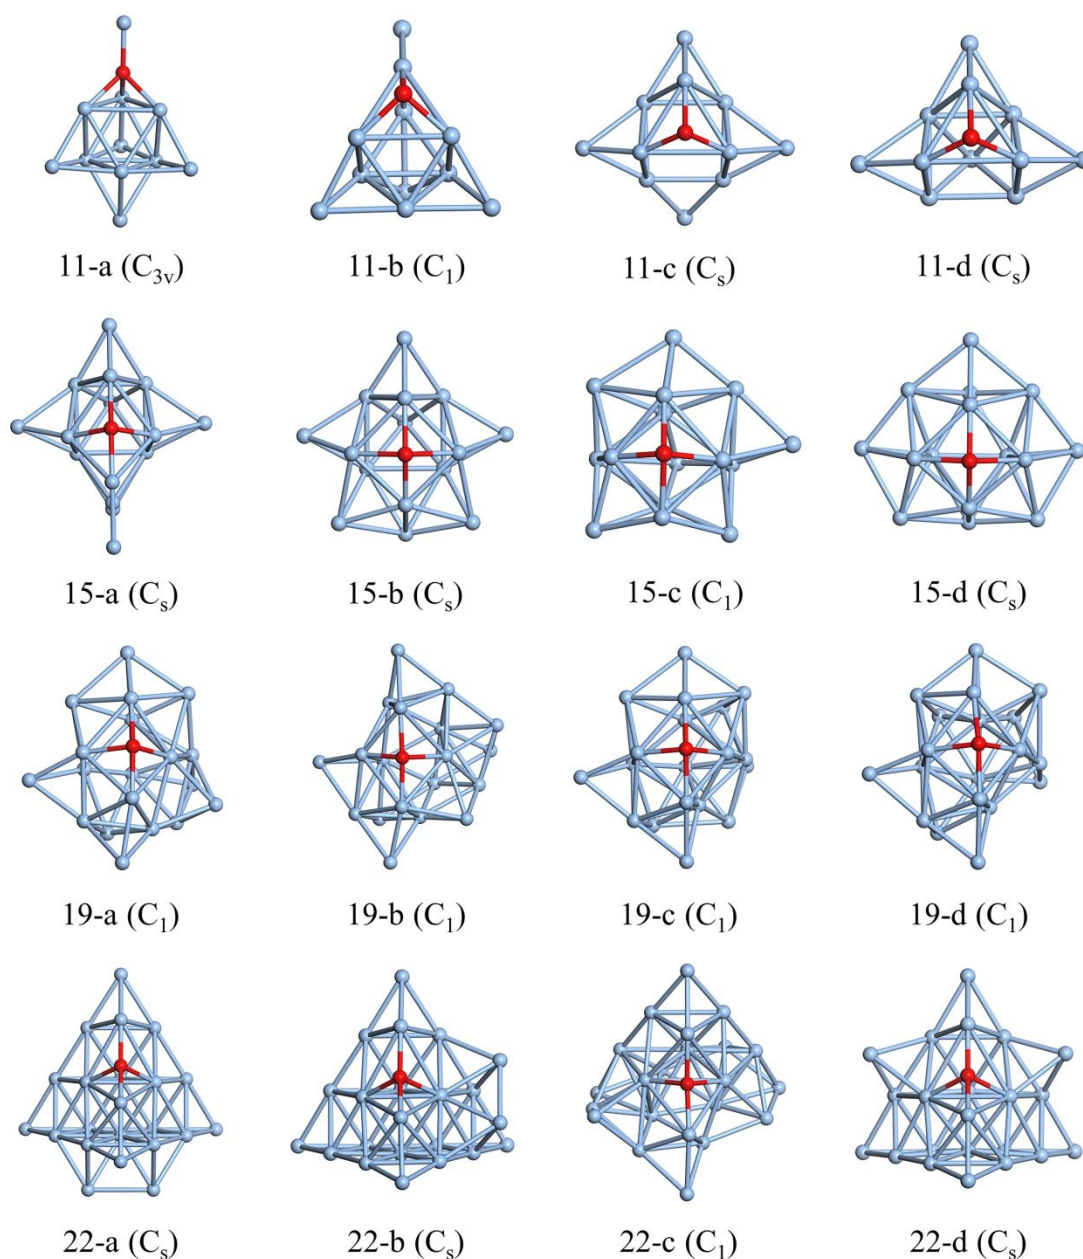

**Figure S7.** Low-energy structures of  $\text{Ag}_{11, 15, 19, 22}\text{O}^+$  clusters. For each size  $n$ , the isomers were marked as  $n$ -b,  $n$ -c,  $n$ -d relating to the energy difference with the lowest-energy one (marked as  $n$ -a). The cluster symmetries are given in brackets. The silver and oxygen atoms are shown in blue and red, respectively.

**Table S4.** The geometric and electronic properties of Ag<sub>11, 15, 19, 22</sub>O<sup>+</sup> clusters from cam-B3LYP/SDD calculation considering zero point and thermal correction, including energy difference between isomers with G-S at each size  $n$  ( $\Delta E_{GS}$ ), binding energy per atom ( $E_b$ ), HOMO-LUMO gap ( $E_{HL}$ ), average bond length between Ag and O ( $R_{Ag-O}$ ), average bond length between Ag and Ag ( $R_{Ag-Ag}$ ), and minimum frequency ( $\nu_{min}$ ).

| Cluster     | $\Delta E_{GS}$ (eV) | $E_b$ (eV)   | $E_{HL}$ (eV) | $R_{Ag-O}$ (Å) | $R_{Ag-Ag}$ (Å) | $\nu_{min}$ (cm <sup>-1</sup> ) |
|-------------|----------------------|--------------|---------------|----------------|-----------------|---------------------------------|
| <b>11-a</b> | <b>0.000</b>         | <b>1.064</b> | <b>3.728</b>  | <b>2.165</b>   | <b>2.849</b>    | <b>26.64</b>                    |
| 11-b        | 0.127                | 1.054        | 4.544         | 2.095          | 2.846           | 15.84                           |
| 11-c        | 0.217                | 1.046        | 4.544         | 2.110          | 2.844           | 16.67                           |
| 11-d        | 0.246                | 1.044        | 4.082         | 2.106          | 2.861           | 16.74                           |
| <b>15-a</b> | <b>0.000</b>         | <b>1.217</b> | <b>3.782</b>  | <b>2.175</b>   | <b>2.881</b>    | <b>14.24</b>                    |
| 15-b        | 0.055                | 1.214        | 3.782         | 2.210          | 2.896           | 28.28                           |
| 15-c        | 0.140                | 1.208        | 3.837         | 2.222          | 2.883           | 20.80                           |
| 15-d        | 0.172                | 1.206        | 3.837         | 2.204          | 2.882           | 25.53                           |
| <b>19-a</b> | <b>0.000</b>         | <b>1.308</b> | <b>3.755</b>  | <b>2.181</b>   | <b>2.855</b>    | <b>26.31</b>                    |
| 19-b        | 0.044                | 1.306        | 3.565         | 2.185          | 2.906           | 24.50                           |
| 19-c        | 0.155                | 1.300        | 3.565         | 2.204          | 2.897           | 22.96                           |
| 19-d        | 0.168                | 1.299        | 3.619         | 2.202          | 2.918           | 22.85                           |
| <b>22-a</b> | <b>0.000</b>         | <b>1.352</b> | <b>2.449</b>  | <b>2.176</b>   | <b>2.890</b>    | <b>23.13</b>                    |
| 22-b        | 0.023                | 1.351        | 2.476         | 2.177          | 2.893           | 21.03                           |
| 22-c        | 0.184                | 1.344        | 2.422         | 2.179          | 2.906           | 22.40                           |
| 22-d        | 0.195                | 1.344        | 2.558         | 2.179          | 2.905           | 26.60                           |

**Table S5.** The geometric and electronic properties of  $\text{Ag}_n\text{O}^+$  ( $n = 7-11, 15, 19, 22$ ) clusters from cam-B3LYP/SDD calculation considering zero point and thermal correction, including average bond length between Ag and O ( $R_{\text{Ag-O}}$ , in Å), bond length between hanging Ag and O ( $R_{\text{Ag(h)-O}}$ , in Å), average bond length between Ag and Ag ( $R_{\text{Ag-Ag}}$ , in Å), average Wiberg bond order between the Ag and O except for hanging Ag atom ( $\text{BO}_{\text{Ag-O}}$ ), Wiberg bond order between the hanging Ag atom and O ( $\text{BO}_{\text{Ag(h)-O}}$ ), average Wiberg bond order between Ag and Ag ( $\text{BO}_{\text{Ag-Ag}}$ ),  $d$ -band center ( $\epsilon_d$ , in eV), and  $s$  orbital center ( $\epsilon_s$ , in eV).

| Cluster     | $R_{\text{Ag-O}}$ | $R_{\text{Ag(h)-O}}$ | $R_{\text{Ag-Ag}}$ | $\text{BO}_{\text{Ag-O}}$ | $\text{BO}_{\text{Ag(h)-O}}$ | $\text{BO}_{\text{Ag-Ag}}$ | $\epsilon_d$  | $\epsilon_s$  |
|-------------|-------------------|----------------------|--------------------|---------------------------|------------------------------|----------------------------|---------------|---------------|
| <b>7-a</b>  | <b>2.236</b>      | <b>2.051</b>         | <b>2.860</b>       | <b>0.244</b>              | <b>0.363</b>                 | <b>0.264</b>               | <b>-14.23</b> | <b>-11.98</b> |
| 7-b         | 2.098             | 2.033                | 2.842              | 0.367                     | 0.367                        | 0.288                      | --            | --            |
| <b>8-a</b>  | <b>2.144</b>      | --                   | <b>2.883</b>       | <b>0.315</b>              | --                           | <b>0.222</b>               | <b>-14.74</b> | <b>-12.7</b>  |
| 8-b         | 2.207             | 2.056                | 2.853              | 0.243                     | 0.329                        | 0.254                      | --            | --            |
| <b>9-a</b>  | <b>2.120</b>      | --                   | <b>2.861</b>       | <b>0.364</b>              | --                           | <b>0.234</b>               | <b>-14.57</b> | <b>-12.44</b> |
| 9-b         | 2.198             | 2.054                | 2.836              | 0.247                     | 0.315                        | 0.287                      | --            | --            |
| <b>10-a</b> | <b>2.194</b>      | <b>2.065</b>         | <b>2.856</b>       | <b>0.241</b>              | <b>0.302</b>                 | <b>0.227</b>               | <b>-13.98</b> | <b>-11.54</b> |
| 10-b        | 2.148             | --                   | 2.879              | 0.299                     | --                           | 0.221                      | --            | --            |
| <b>11-a</b> | <b>2.203</b>      | <b>2.051</b>         | <b>2.849</b>       | <b>0.235</b>              | <b>0.332</b>                 | <b>0.248</b>               | <b>-13.76</b> | <b>-12.22</b> |
| 11-b        | 2.095             | --                   | 2.846              | 0.354                     | --                           | 0.257                      | --            | --            |
| <b>15-a</b> | <b>2.175</b>      | --                   | <b>2.881</b>       | <b>0.234</b>              | --                           | <b>0.244</b>               | <b>-13.77</b> | <b>-10.87</b> |
| 15-b        | 2.210             | --                   | 2.896              | 0.270                     | --                           | 0.229                      | --            | --            |
| <b>19-a</b> | <b>2.181</b>      | --                   | <b>2.855</b>       | <b>0.250</b>              | --                           | <b>0.222</b>               | <b>-13.62</b> | <b>-12.23</b> |
| 19-b        | 2.185             | --                   | 2.906              | 0.246                     | --                           | 0.221                      | --            | --            |
| <b>22-a</b> | <b>2.176</b>      | --                   | <b>2.890</b>       | <b>0.215</b>              | --                           | <b>0.211</b>               | <b>-13.51</b> | <b>-12.00</b> |
| 22-b        | 2.177             | --                   | 2.893              | 0.228                     | --                           | 0.210                      | --            | --            |

**Table S6.** The mixing character of O and silver atoms coordinated with O to the frontier orbitals of  $\text{Ag}_n\text{O}^+$  ( $n = 7\text{--}11, 15, 19, 22$ ) clusters from cam-B3LYP/SDD calculation considering zero point and thermal correction and analyzed by neutral atomic orbital (NAO) method.

| Orbital     | HOMO         |                    | HOMO-1       |                    | HOMO-2       |                    | HOMO-3       |                    | HOMO-4       |                    | HOMO-5       |                    | HOMO-6       |                    | HOMO-7       |                    |
|-------------|--------------|--------------------|--------------|--------------------|--------------|--------------------|--------------|--------------------|--------------|--------------------|--------------|--------------------|--------------|--------------------|--------------|--------------------|
| Percent (%) | O            | Ag <sub>Ag-O</sub> |
| <b>7-a</b>  | <b>6.15</b>  | <b>27.58</b>       | <b>30.10</b> | <b>36.35</b>       | <b>59.28</b> | <b>39.35</b>       | <b>44.87</b> | <b>48.45</b>       | <b>15.88</b> | <b>49.21</b>       | <b>3.92</b>  | <b>20.23</b>       | <b>0.69</b>  | <b>49.67</b>       | <b>5.11</b>  | <b>44.85</b>       |
| 7-b         | 2.92         | 22.75              | 74.57        | 23.08              | 42.01        | 39.03              | 53.54        | 44.41              | 5.76         | 44.81              | 0.56         | 59.09              | 0.00         | 82.35              | 0.00         | 69.76              |
| <b>8-a</b>  | <b>6.39</b>  | <b>24.66</b>       | <b>7.90</b>  | <b>19.00</b>       | <b>52.21</b> | <b>27.20</b>       | <b>46.52</b> | <b>44.74</b>       | <b>43.86</b> | <b>45.72</b>       | <b>11.36</b> | <b>43.06</b>       | <b>0.22</b>  | <b>52.89</b>       | <b>0.24</b>  | <b>22.94</b>       |
| 8-b         | 5.56         | 41.39              | 4.04         | 26.09              | 31.98        | 38.55              | 49.73        | 45.61              | 46.46        | 48.50              | 10.66        | 46.85              | 3.18         | 32.13              | 0.63         | 57.24              |
| 8-c         | 7.22         | 40.37              | 1.57         | 27.47              | 39.33        | 37.82              | 51.23        | 45.29              | 46.92        | 46.35              | 8.49         | 46.09              | 0.34         | 27.83              | 1.19         | 56.42              |
| <b>9-a</b>  | <b>54.47</b> | <b>19.65</b>       | <b>35.41</b> | <b>17.06</b>       | <b>35.39</b> | <b>17.07</b>       | <b>24.07</b> | <b>40.60</b>       | <b>24.05</b> | <b>40.62</b>       | <b>8.90</b>  | <b>45.58</b>       | <b>0.00</b>  | <b>65.45</b>       | <b>0.56</b>  | <b>70.42</b>       |
| 9-b         | 1.56         | 20.88              | 6.03         | 23.32              | 31.05        | 36.99              | 40.48        | 51.72              | 50.90        | 44.96              | 11.14        | 43.89              | 2.27         | 42.71              | 1.75         | 34.75              |
| <b>10-a</b> | <b>3.48</b>  | <b>47.46</b>       | <b>5.15</b>  | <b>19.07</b>       | <b>5.16</b>  | <b>19.09</b>       | <b>39.49</b> | <b>43.33</b>       | <b>47.56</b> | <b>47.38</b>       | <b>47.47</b> | <b>47.43</b>       | <b>5.50</b>  | <b>54.13</b>       | <b>0.00</b>  | <b>70.81</b>       |
| 10-b        | 5.70         | 20.11              | 8.26         | 16.29              | 9.77         | 14.16              | 46.19        | 45.05              | 44.08        | 45.63              | 45.79        | 33.75              | 0.53         | 58.32              | 4.42         | 44.91              |
| <b>11-a</b> | <b>4.47</b>  | <b>21.66</b>       | <b>3.15</b>  | <b>18.53</b>       | <b>3.17</b>  | <b>18.52</b>       | <b>49.14</b> | <b>46.17</b>       | <b>49.08</b> | <b>46.23</b>       | <b>37.43</b> | <b>43.89</b>       | <b>1.84</b>  | <b>11.89</b>       | <b>1.84</b>  | <b>11.87</b>       |
| 11-b        | 21.92        | 17.81              | 44.86        | 21.69              | 39.63        | 33.80              | 47.52        | 24.37              | 9.38         | 36.35              | 5.63         | 27.68              | 4.11         | 44.96              | 5.67         | 53.62              |
| <b>15-a</b> | <b>3.46</b>  | <b>13.26</b>       | <b>0.20</b>  | <b>17.86</b>       | <b>18.75</b> | <b>23.92</b>       | <b>34.38</b> | <b>29.14</b>       | <b>35.29</b> | <b>21.23</b>       | <b>36.30</b> | <b>22.17</b>       | <b>16.00</b> | <b>41.30</b>       | <b>9.27</b>  | <b>39.03</b>       |
| 15-b        | 0.61         | 18.18              | 3.08         | 19.76              | 4.83         | 19.60              | 52.21        | 22.31              | 41.09        | 26.42              | 47.55        | 25.93              | 7.67         | 39.86              | 6.18         | 40.46              |
| <b>19-a</b> | <b>1.46</b>  | <b>11.12</b>       | <b>3.88</b>  | <b>12.90</b>       | <b>0.74</b>  | <b>9.85</b>        | <b>1.02</b>  | <b>16.76</b>       | <b>36.65</b> | <b>24.98</b>       | <b>41.04</b> | <b>27.48</b>       | <b>39.77</b> | <b>27.96</b>       | <b>26.17</b> | <b>32.12</b>       |
| 19-b        | 1.84         | 11.45              | 4.23         | 13.04              | 3.05         | 15.44              | 5.89         | 16.50              | 46.94        | 25.52              | 28.78        | 27.64              | 40.65        | 31.43              | 23.90        | 25.89              |
| <b>22-a</b> | <b>3.05</b>  | <b>12.81</b>       | <b>5.89</b>  | <b>9.05</b>        | <b>0.36</b>  | <b>6.09</b>        | <b>8.69</b>  | <b>11.99</b>       | <b>0.35</b>  | <b>6.88</b>        | <b>16.30</b> | <b>15.90</b>       | <b>36.13</b> | <b>34.26</b>       | <b>51.63</b> | <b>36.80</b>       |
| 22-b        | 0.77         | 12.69              | 6.15         | 9.19               | 0.01         | 14.41              | 8.71         | 8.78               | 0.20         | 17.73              | 15.73        | 21.63              | 40.79        | 32.04              | 41.97        | 33.58              |



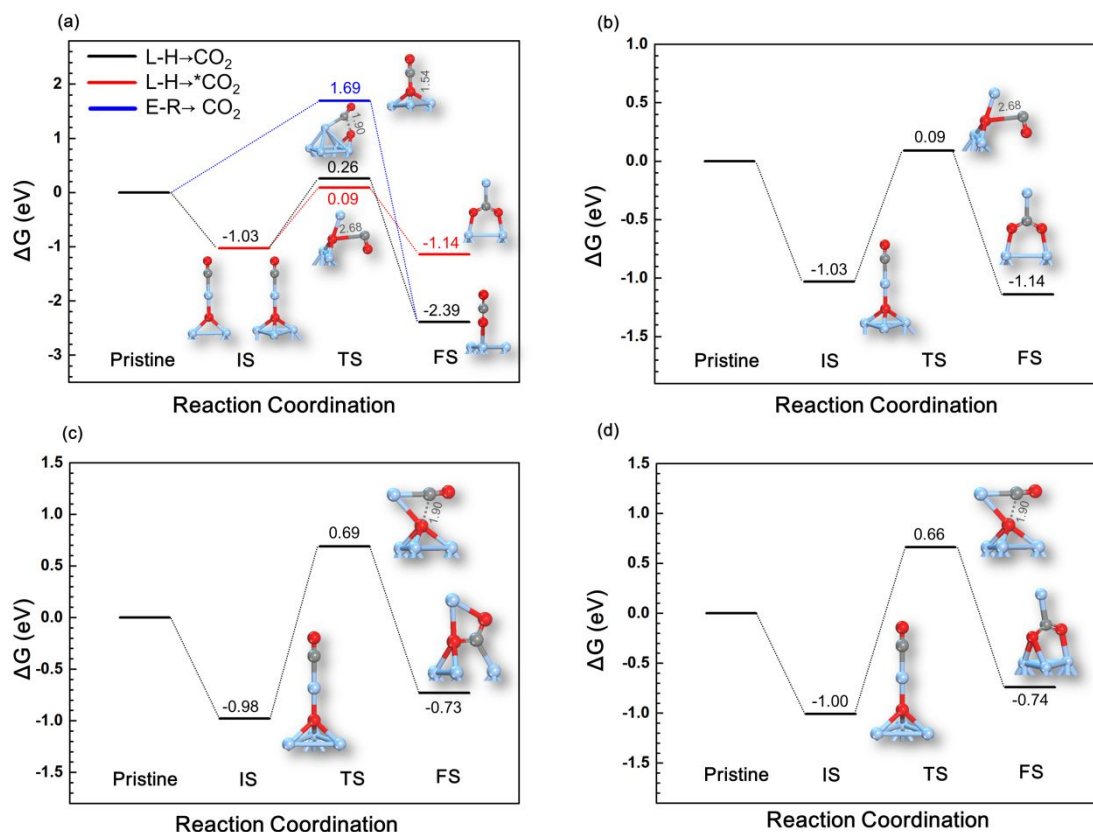

**Figure S8.** Free energy and corresponding atomic structure of reaction intermediates for the reactions between (a)  $\text{Ag}_8\text{O}^+\text{-a}$ ; (b)  $\text{Ag}_8\text{O}^+\text{-b}$  cluster; (c)  $\text{Ag}_{10}\text{O}^+\text{-a}$  cluster; (d)  $\text{Ag}_{11}\text{O}^+\text{-a}$  cluster and CO. Only the Langmuir-Hinshelwood mechanism was considered for  $\text{Ag-O}_{\text{in}}\text{-Ag}_{n-1}^+$  clusters that have inserted  $\text{O}_{\text{in}}$ . Both the Langmuir-Hinshelwood mechanism (pathway 1 in black and pathway 2 in red) and the Eley-Rideal mechanism (in blue) were considered for the clusters having terminal  $\text{O}_{\text{te}}$ .

**Table S7.** EDA results for  $\text{Ag}_n\text{O}^+$  ( $n = 7-11, 15, 19$ ) clusters under the cam-B3LYP/TZP level of theory using ADF 2018.104, taking  $\text{Ag}_n^+$  and O as interacting fragments. Energy values are given in eV.

| Cluster                          | $\Delta E_{\text{pauli}}$ | $\Delta E_{\text{elstat}}$ | $\Delta E_{\text{oi}}$ | $\Delta E_{\text{int}}$ |
|----------------------------------|---------------------------|----------------------------|------------------------|-------------------------|
| $\text{Ag}_7\text{O}^+$          | 16.31                     | −8.52 (31%)                | −19.00 (69%)           | −11.21                  |
| $\text{Ag}_8\text{O}^+\text{-a}$ | 12.47                     | −5.93 (26%)                | −17.27 (74%)           | −10.72                  |
| $\text{Ag}_8\text{O}^+\text{-b}$ | 16.57                     | −8.37 (30%)                | −20.00 (70%)           | −11.80                  |
| $\text{Ag}_9\text{O}^+$          | 13.96                     | −7.13 (29%)                | −17.18 (71%)           | −10.35                  |
| $\text{Ag}_{10}\text{O}^+$       | 17.10                     | −8.59 (29%)                | −20.57 (71%)           | −12.07                  |
| $\text{Ag}_{11}\text{O}^+$       | 17.58                     | −9.18 (31%)                | −20.13 (69%)           | −11.73                  |
| $\text{Ag}_{15}\text{O}^+$       | 16.75                     | −8.60 (31%)                | −19.40 (69%)           | −11.26                  |
| $\text{Ag}_{19}\text{O}^+$       | 16.22                     | −8.35 (31%)                | −18.87 (69%)           | −10.99                  |

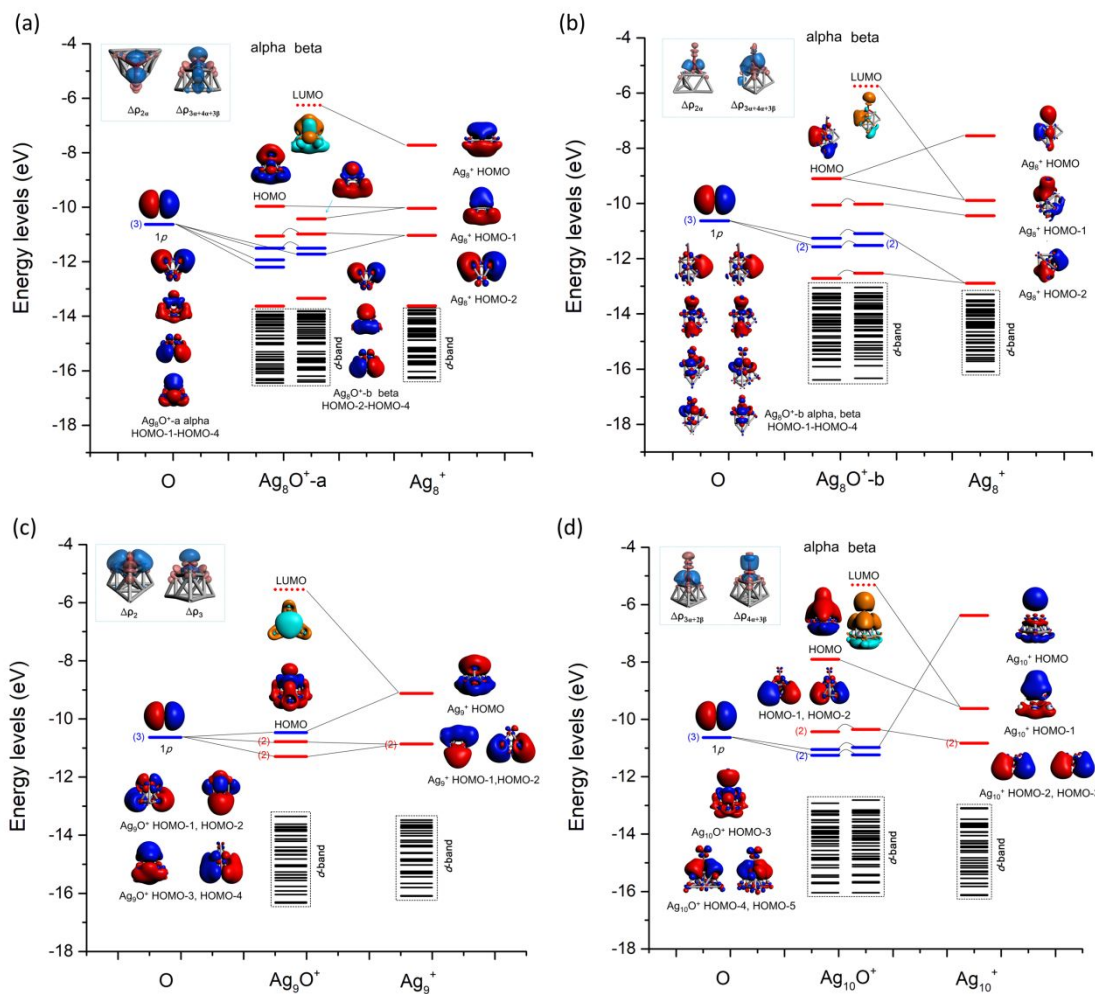

**Figure S9.** Energy level correlations between  $\text{Ag}_{8-10}\text{O}^+$  clusters, O atom, and  $\text{Ag}_{8-10}^+$  fragments, and electron cloud distributions of frontier orbitals of these clusters. Blue and red colors denote positive and negative phases of the wave function, respectively. Top left insets display the electron deformation density plots ( $\Delta\rho$ ) of NOCV pairwise orbital interactions between  $\text{Ag}_{8-10}^+$  and O fragments calculated at the cam-B3LYP/TZP level of theory using ADF 2018.104. The electrons transfer from light blue to light red. The isosurface values for electron cloud distribution and deformation electron density are  $\pm 0.014$  a.u. and  $\pm 0.0015$  a.u., respectively.

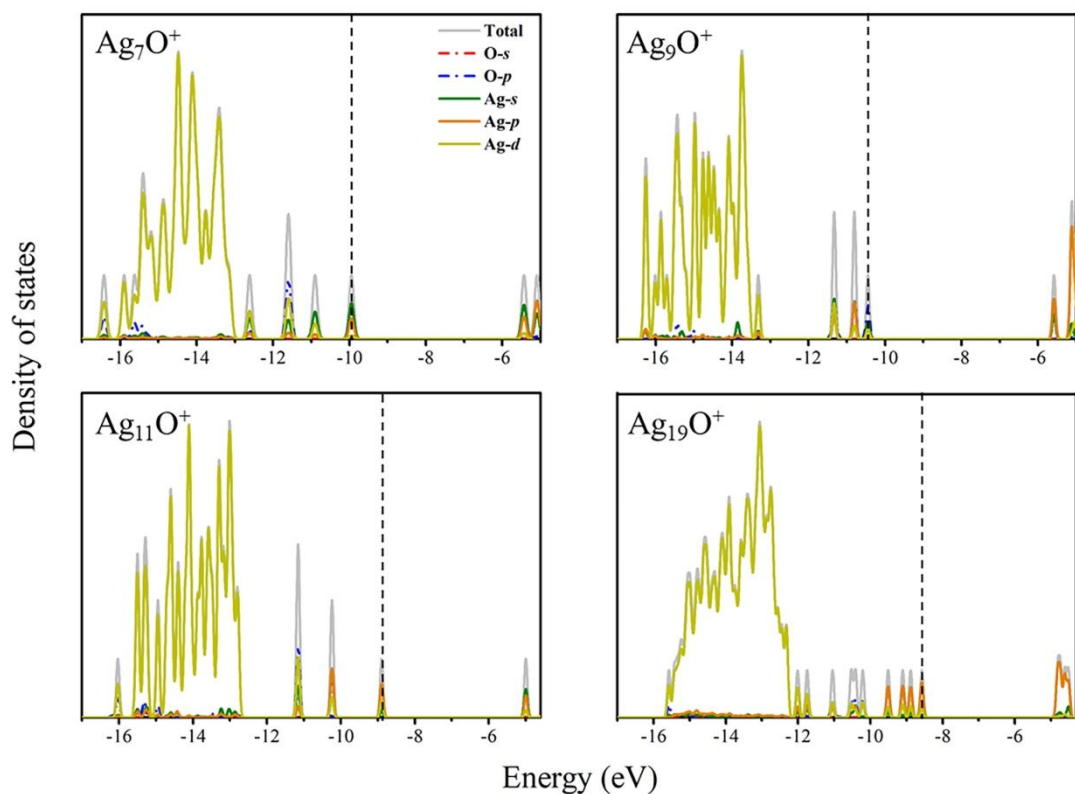

**Figure S10.** Total (solid light grey) and partial densities of states (PDOS) (*s*, *p* of O are in dash red, blue, respectively; *s*, *p*, *d* of Ag are in solid green, orange, yellow, respectively.) of the  $\text{Ag}_7$ ,  $\text{Ag}_9$ ,  $\text{Ag}_{11}$ ,  $\text{Ag}_{19}\text{O}^+$ -a clusters. Orbital energies are calculated at the cam-B3LYP/SDD level of theory considering zero point and thermal correction. The black dotted line marks the HOMO level of each cluster.

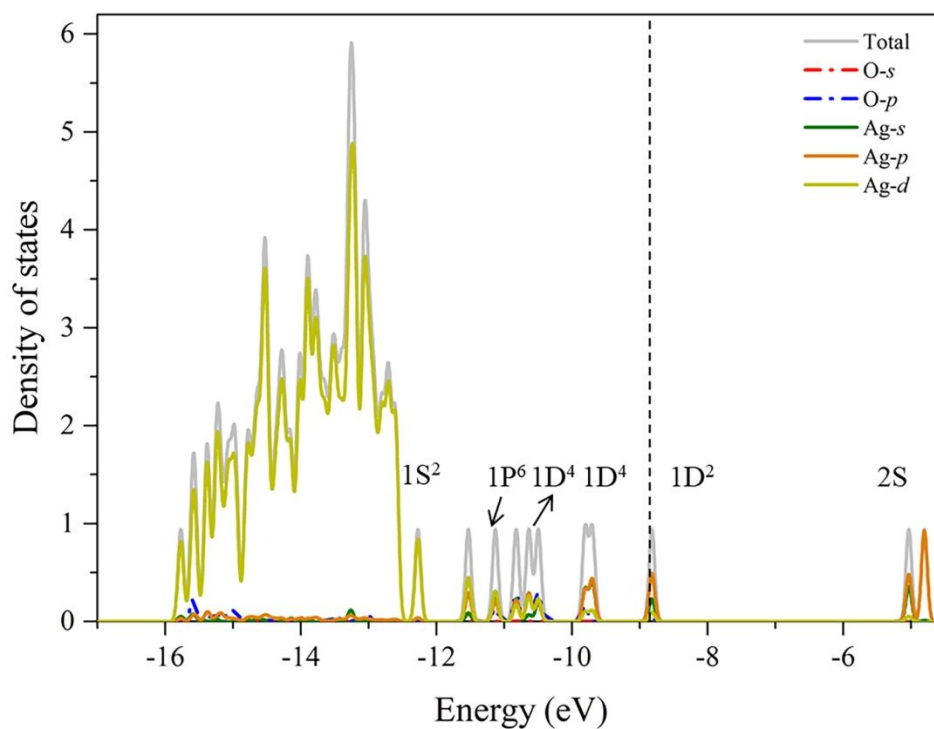

**Figure S11.** Total (solid light grey) and PDOSs (*s*, *p* of O are in dash red, blue, respectively; *s*, *p*, *d* of Ag are in solid green, orange, yellow, respectively.) of the  $\text{Ag}_{15}\text{O}^+\text{-a}$  cluster. Orbital energies are calculated at the cam-B3LYP/SDD level of theory considering zero point and thermal correction. Molecular orbitals are shown and assigned based on comparison with phenomenological shell model orbitals. The black dotted line marks the HOMO level.

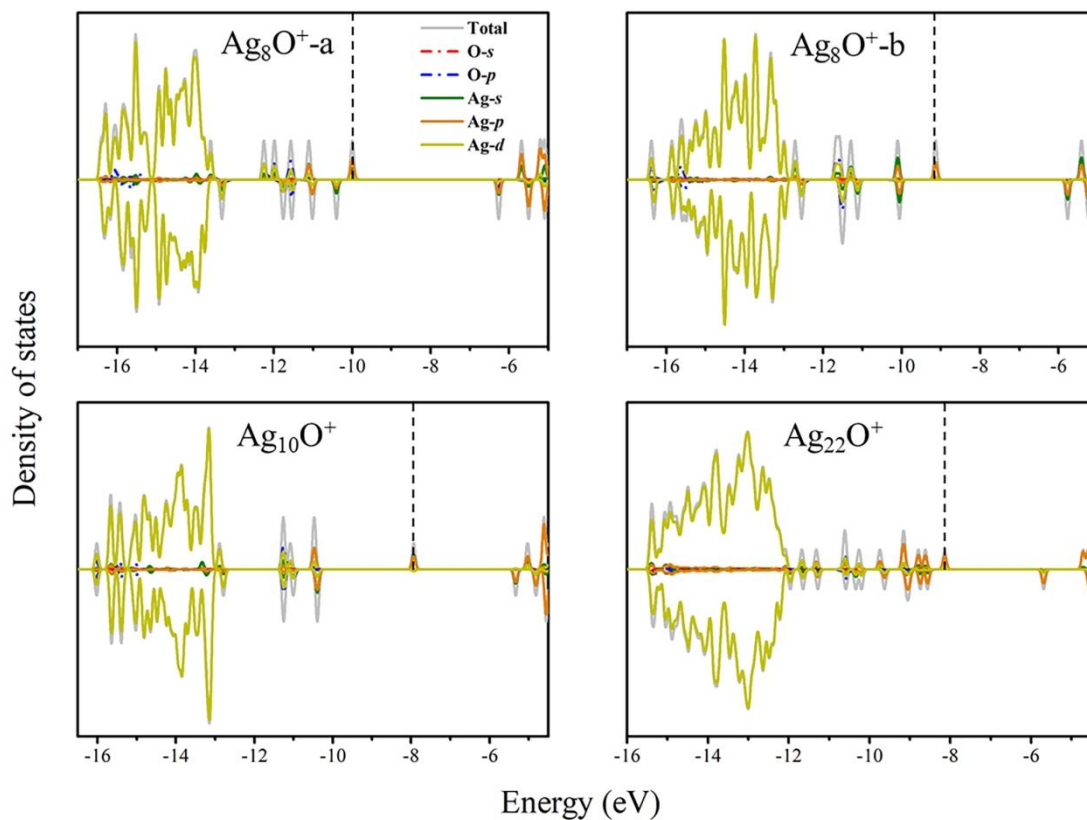

**Figure S12.** Total (solid light grey) and PDOSs (*s*, *p* of O are in dash red, blue, respectively; *s*, *p*, *d* of Ag are in solid green, orange, yellow, respectively.) of the  $\text{Ag}_8\text{O}^+\text{-a}$ ,  $\text{Ag}_8\text{O}^+\text{-b}$ ,  $\text{Ag}_{10}$ ,  $_{22}^+\text{-a}$  clusters. Orbital energies are calculated at the cam-B3LYP/SDD level of theory considering zero point and thermal correction. The black dotted line marks the HOMO level of each cluster.

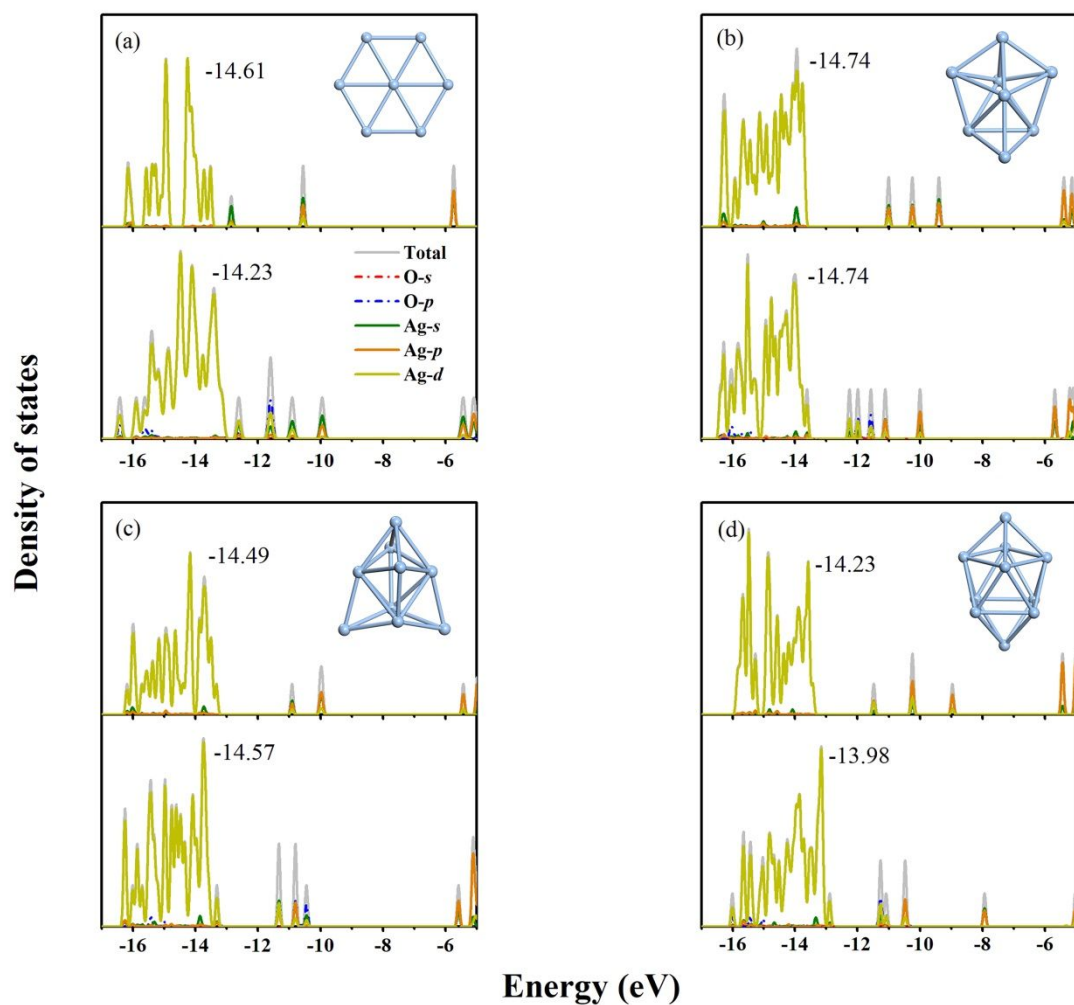

**Figure S13.** The compared PDOSs between (a) pure  $\text{Ag}_7^+$  with  $\text{Ag}_7\text{O}^+$  cluster; (b) pure  $\text{Ag}_8^+$  with  $\text{Ag}_8\text{O}^+$  cluster; (c) pure  $\text{Ag}_9^+$  with  $\text{Ag}_9\text{O}^+$  cluster; (d) pure  $\text{Ag}_{10}^+$  with  $\text{Ag}_{10}\text{O}^+$  cluster. The insets in PDOS are the corresponding structure of each pure  $\text{Ag}_{7-10}^+$  clusters. The values are  $d$ -band center energies for each cluster.

**Table S8.** EDA-NOCV results for  $\text{Ag}_n\text{OCO}^+$  ( $n = 7-11, 15$ ) complexes under the cam-B3LYP+D3/TZP level of theory using ADF 2018.104, taking  $\text{Ag}_n\text{O}^+$  cluster and CO molecular as interacting fragments. Energy values are given in eV.

|                                                  | $\text{Ag}_7\text{O}^+$ | $\text{Ag}_8\text{O}^+\text{-a}$ | $\text{Ag}_8\text{O}^+\text{-b}$ | $\text{Ag}_9\text{O}^+$ | $\text{Ag}_{10}\text{O}^+$ | $\text{Ag}_{11}\text{O}^+$ | $\text{Ag}_{15}\text{O}^+$ |
|--------------------------------------------------|-------------------------|----------------------------------|----------------------------------|-------------------------|----------------------------|----------------------------|----------------------------|
| $\Delta E_{\text{int}}$                          | -1.24                   | -2.08                            | -2.11                            | -1.17                   | -1.85                      | -1.18                      | -0.36                      |
| $\Delta E_{\text{pauli}}$                        | 4.28                    | 4.45                             | 4.41                             | 4.56                    | 4.82                       | 4.94                       | 3.35                       |
| $\Delta E_{\text{elstat}}$                       | -3.74                   | -3.88                            | -3.77                            | -3.90                   | -3.91                      | -4.16                      | -2.55                      |
| $\Delta E_{\text{dist}}$                         | 0.40                    | -0.36                            | -0.46                            | 0.42                    | -0.33                      | 0.41                       | 0.30                       |
| $\Delta E_{\text{oi}}$                           | -2.17                   | -2.30                            | -2.29                            | -2.26                   | -2.43                      | -2.38                      | -1.46                      |
| $\Delta E_{\text{oi}(\sigma\text{-donation})}$   | -1.14                   | -0.35                            | -0.48                            | -1.14                   | -0.47                      | -1.20                      | -0.63                      |
| $\Delta E_{\text{oi}(\pi\text{-back donation})}$ | -1.02                   | -1.83                            | -1.68                            | -1.10                   | -1.81                      | -1.16                      | -0.20                      |
| $\Delta E_{\text{oi}(\text{rest})}$              | -0.02                   | -0.11                            | -0.13                            | -0.02                   | -0.15                      | -0.01                      | -0.64                      |



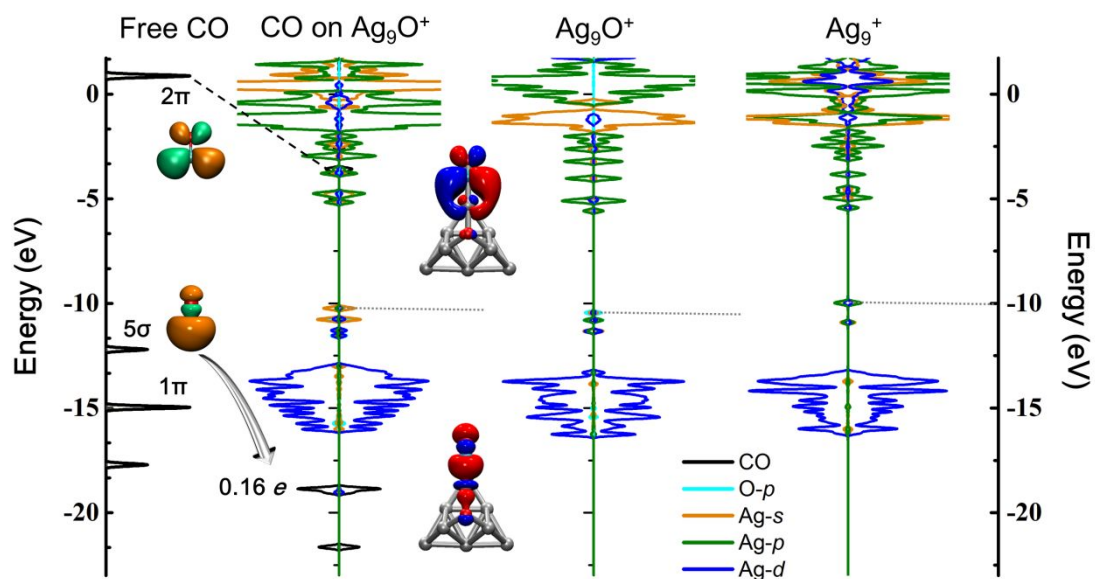

**Figure S14.** From left to right: DOS (or PDOS) of free CO molecule, CO chemisorbed on the  $\text{Ag}_9\text{O}^+$  cluster, the pristine  $\text{Ag}_9\text{O}^+$  and the  $\text{Ag}_9^+$  cluster, respectively. The insets display the electron cloud distributions of CO and  $\text{Ag}_9\text{O}^+$  orbitals. The isosurface value is  $\pm 0.04$  a.u. The light grey dash line marked the HOMOs of  $\text{Ag}_9\text{OCO}^+$  complex,  $\text{Ag}_9\text{O}^+$ , and  $\text{Ag}_9^+$  cluster, respectively.

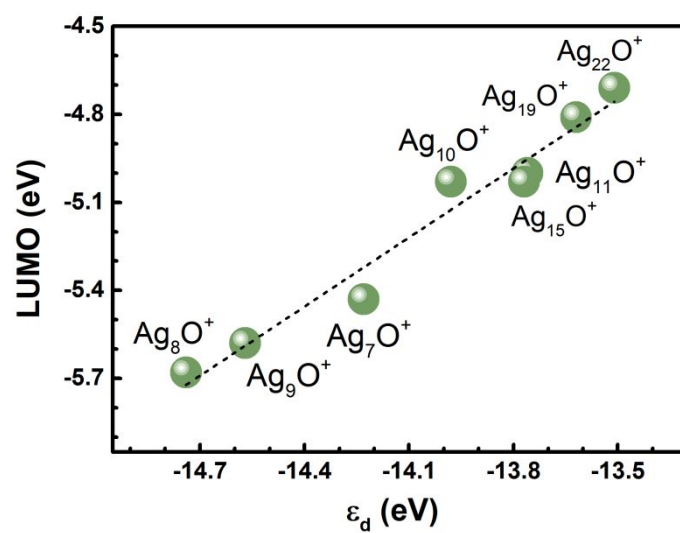

**Figure S15.** LUMO as a function of  $\epsilon_d$   $d$ -band center of  $\text{Ag}_n\text{O}^+$  clusters.

**Table S9.** The geometric and electronic properties of  $\text{Ag}_{7-11}, {}_{15}\text{O}^+$  clusters from cam-B3LYP/aug-cc-pVDZ-pp/Ag/6-311G(d)/C/O calculation considering D3 correction, including the NPA charge of O atom of cluster ( $Q_{\text{O}}$ , in e), active Ag site of cluster ( $Q_{\text{Ag}^*}$ , in e), C atom of CO ( $Q_{\text{CO-C}}$ , in e), O atom of CO ( $Q_{\text{CO-O}}$ , in e); average bond length between Ag and O ( $R_{\text{Ag-O}}$ , in Å), bond length between active Ag site and C ( $R_{\text{Ag}^*\text{-C}}$ , in Å), and bond length between C and O of CO ( $R_{\text{C-O(CO)}}$ , in Å).

| Reaction                            | $Q_{\text{O}}$ | $Q_{\text{Ag}^*}$ | $Q_{\text{CO-C}}$ | $Q_{\text{CO-O}}$ | $R_{\text{Ag-O}}$ | $R_{\text{Ag}^*\text{-C}}$ | $R_{\text{C-O(CO)}}$ |
|-------------------------------------|----------------|-------------------|-------------------|-------------------|-------------------|----------------------------|----------------------|
| gas CO                              | --             | --                | 0.469             | -0.469            | --                | --                         | 1.122                |
| 7-a                                 | -1.348         | 0.814             | --                | --                | 2.182             | --                         | --                   |
| *CO                                 | -1.308         | 0.599             | 0.503             | -0.344            | 2.174             | 1.988                      | 1.118                |
| TS                                  | -1.307         | 0.794             | 0.587             | -0.552            | 2.219             | 2.789                      | 1.170                |
| *CO <sub>2</sub>                    | -0.730         | 0.578             | 0.508             | -0.848            | 2.260             | 2.105                      | 1.292                |
| 8-a                                 | -1.066         | 0.580             | --                | --                | 2.120             | --                         | --                   |
|                                     | -1.252         | 0.599             | 0.499             | -0.354            | 2.047             | 1.977                      | 1.119                |
| *CO                                 | -1.296         | 0.619             | 0.502             | -0.343            | 2.153             | 1.990                      | 1.118                |
| TS <sub>L-H</sub> →CO <sub>2</sub>  | -0.667         | 0.241             | 0.515             | -0.402            | 2.262             | 2.262                      | 1.162                |
| TS <sub>L-H</sub> →*CO <sub>2</sub> | -1.309         | 0.795             | 0.533             | -0.483            | 2.105             | 2.617                      | 1.161                |
| TS <sub>E-R</sub> →CO <sub>2</sub>  | -0.971         | 0.400             | 0.970             | -0.344            | 2.123             | 3.115                      | 1.122                |
| *CO <sub>2</sub>                    | -0.755         | 0.552             | 0.537             | -0.755            | 2.118             | 2.111                      | 1.257                |
| CO <sub>2</sub>                     | -0.555         | 0.243             | 1.057             | -0.442            | 2.520             | 5.428                      | 1.146                |
| 8-b                                 | -1.335         | 0.834             | --                | --                | 2.161             | --                         | --                   |
| *CO                                 | -1.296         | 0.619             | 0.502             | -0.343            | 2.153             | 1.990                      | 1.118                |
| TS                                  | -1.309         | 0.795             | 0.533             | -0.483            | 2.079             | 2.615                      | 1.161                |
| *CO <sub>2</sub>                    | -0.755         | 0.552             | 0.537             | -0.755            | 2.118             | 2.111                      | 1.257                |
| 9-a                                 | -1.164         | 0.446             | --                | --                | 2.103             | --                         | --                   |
| *CO                                 | -1.198         | 0.594             | 0.514             | -0.355            | 2.068             | 1.982                      | 1.120                |
| TS <sub>L-H</sub>                   | -1.176         | 0.243             | 0.523             | -0.429            | 2.195             | 2.251                      | 1.164                |
| TS <sub>E-R</sub>                   | -1.014         | 0.246             | 0.983             | -0.358            | 2.105             | 3.225                      | 1.122                |
| CO <sub>2</sub>                     | -0.488         | 0.084             | 1.042             | -0.488            | --                | 3.400                      | 1.156                |
| 10-a                                | -1.325         | 0.323             | --                | --                | 2.153             | --                         | --                   |
| *CO                                 | -1.290         | 0.627             | 0.503             | -0.347            | 2.144             | 1.990                      | 1.118                |
| TS                                  | -1.228         | 0.822             | 0.456             | -0.474            | 2.264             | 2.225                      | 1.178                |
| *CO <sub>2</sub>                    | -0.716         | 0.564             | 0.538             | -0.833            | 2.261             | 2.108                      | 1.287                |
| 11-a                                | -1.330         | 0.822             | --                | --                | 2.153             | --                         | --                   |
| *CO                                 | -1.296         | 0.625             | 0.504             | -0.348            | 2.148             | 1.988                      | 1.119                |

|                  |        |       |       |        |       |       |       |
|------------------|--------|-------|-------|--------|-------|-------|-------|
| TS               | −1.226 | 0.815 | 0.442 | −0.450 | 2.250 | 2.148 | 1.141 |
| *CO <sub>2</sub> | −0.845 | 0.551 | 0.535 | −0.725 | 2.223 | 2.104 | 1.242 |
| 15-a             | −1.252 | 0.326 | --    | --     | 2.164 | --    | --    |
| *CO              | −1.235 | 0.152 | 0.551 | −0.383 | 2.168 | 2.161 | 1.120 |

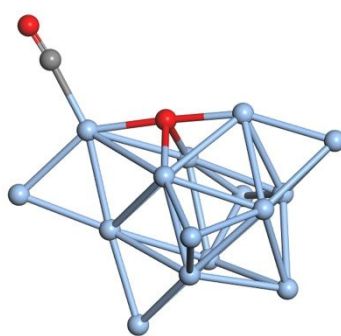

$$\Delta G = -0.09 \text{ eV}$$

**Figure S16.** Free energy and corresponding atomic structure for CO adsorbed on  $\text{Ag}_{15}\text{O}^+$ -a cluster.

## Reference:

- (1) Frisch, M.; Trucks, G.; Schlegel, H.; Scuseria, G.; Robb, M.; Cheeseman, J.; Scalmani, G.; Barone, V.; Petersson, G.; Nakatsuji, H., Gaussian 16, Revision A. 03, Gaussian, Inc., Wallingford CT **2016**.
- (2) Zhao, J. J.; Shi, R. L.; Sai, L. W.; Huang, X. M.; Su, Y., Comprehensive Genetic Algorithm for Ab Initio Global Optimisation of Clusters. *Mol. Simul.* **2016**, *42*, 809-819.
- (3) Fonseca Guerra, C.; Snijders, J. G.; te Velde, G.; Baerends, E. J., Towards an Order-N Dft Method. *Theor. Chem. Acc.* **1998**, *99*, 391-403.
- (4) te Velde, G.; Bickelhaupt, F. M.; Baerends, E. J.; Fonseca Guerra, C.; van Gisbergen, S. J. A.; Snijders, J. G.; Ziegler, T., Chemistry with Adf. *J. Comput. Chem.* **2001**, *22*, 931-967.
- (5) Baerends, E. J. Z., T.; Autschbach, J.; Bashford, D.; Bérce, A.; Bickelhaupt, F.; Bo, C.; Boerrigter, P.; Cavallo, L.; Chong, D., Adf2018, Scm, Theoretical Chemistry, Vrije Universiteit, Amsterdam, the Netherlands. <http://www.scm.com>. (accessed Oct 24, 2018).
- (6) Zhao, L. L.; von Hopffgarten, M.; Andrada, D. M.; Frenking, G., Energy Decomposition Analysis. *WIREs Comput. Mol. Sci.* **2018**, *8*, 37.
- (7) Zhao, L. L.; Hermann, M.; Schwarz, W. H. E.; Frenking, G., The Lewis Electron-Pair Bonding Model: Modern Energy Decomposition Analysis. *Nat. Rev. Chem.* **2019**, *3*, 48-63.
- (8) Mitoraj, M. P.; Michalak, A.; Ziegler, T., A Combined Charge and Energy Decomposition Scheme for Bond Analysis. *J. Chem. Theory Comput.* **2009**, *5*, 962-975.
- (9) Ghosh, A.; Chaudhuri, R. K.; Chattopadhyay, S., Relativistic State-Specific Multireference Coupled Cluster Theory Description for Bond-Breaking Energy Surfaces. *J. Chem. Phys.* **2016**, *145*, 124303.
- (10) Meunier, A.; Lévy, B.; Berthier, G., Corrélation électronique Et Effets De Base Dans L'étude De La Liaison Hydrogène: Le Dimère Mixte Ammoniac-Eau. *Theor. Chim. Acta* **1973**, *29*, 49-55.
